# Supplementary material for: Hedgehog Signaling Regulates MyoD Expression and Activity
Source: PubMed Central journal article supplement — J Biol Chem. 2012 Dec 24;288(6):4389–404. doi: 10.1074/jbc.M112.400184 (PMC3567689; doi:10.1074/jbc.m112.400184), 2012-12-24
Supplement: supp_M112.400184_jbc.M112.400184-1.pdf [file supp_M112.400184_jbc.M112.400184-1.pdf]

Supporting Online Material for:

**HEDGEHOG SIGNALLING REGULATES MYOD EXPRESSION AND ACTIVITY**

Anastassia Voronova<sup>1</sup>, Erin Coyne<sup>1</sup>, Ashraf Al Madhoun<sup>1,2</sup>, Joel V. Fair<sup>1</sup>, Neven Bosiljcic<sup>1</sup>, Catherine St-Louis<sup>3</sup>, Grace Li<sup>3</sup>, Sherry Thurig<sup>1,4</sup>, Valerie A. Wallace<sup>1,4</sup>, Nadine Wiper-Bergeron<sup>3</sup> and Ilona S. Skerjanc<sup>1\*</sup>

From the 1) Department of Biochemistry, Microbiology and Immunology, 2) Pancreatic Islet Biology and Transplantation Unit, Dasman Diabetes Institute, Dasman, Kuwait, 3) Department of Cellular and Molecular Medicine, Faculty of Medicine, University of Ottawa, and 4) Ottawa Hospital Research Institute, Ottawa K1H 8M5, Canada

Running title: Hh regulates MyoD expression and activity

\*To whom correspondence should be addressed: Ilona S. Skerjanc, Department of Biochemistry, Microbiology and Immunology, Faculty of Medicine, University of Ottawa, Ottawa ON, K1H 8M5, Canada, Tel.: (613) 562-5800 ext 8669; Email: [iskerjan@uottawa.ca](mailto:iskerjan@uottawa.ca)

This PDF file includes supplementary:

Figure Legends

Figures S1-S6

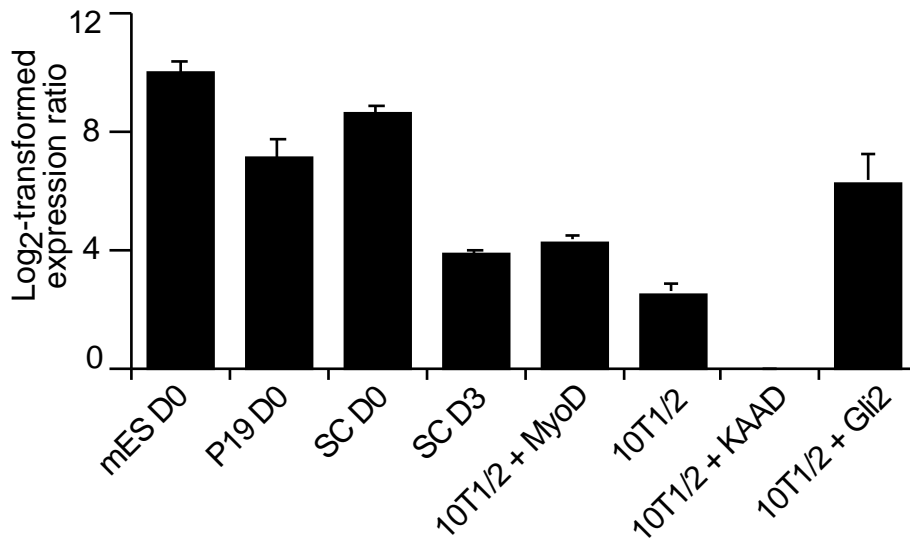

Fig. S1 QPCR analysis of Gli1 mRNA expression in mouse ES (mES), P19, satellite cells (SC) and 10T1/2 fibroblasts transfected with MyoD or Gli2 or treated with or without KAAD-cyclopamine (KAAD). Data is relative to 10T1/2 cells treated with KAAD-cyclopamine. Error bars represent SEM from three biological replicas (n=3). D=day.

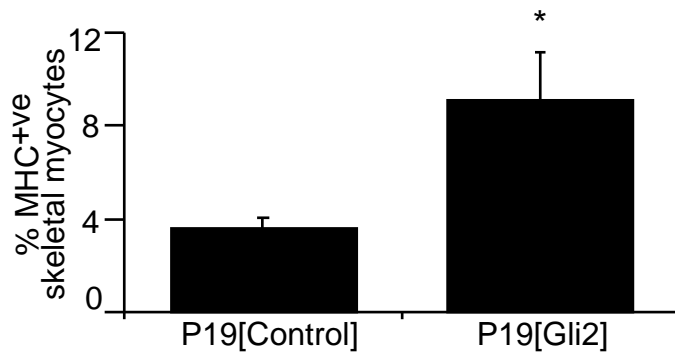

Fig. S2 MHC-positive skeletal myocytes from Fig. 2A were counted in 10 random fields and expressed as % of the total number of nuclei, n=4. In total, 20,000 cells were counted.\*p<0.05

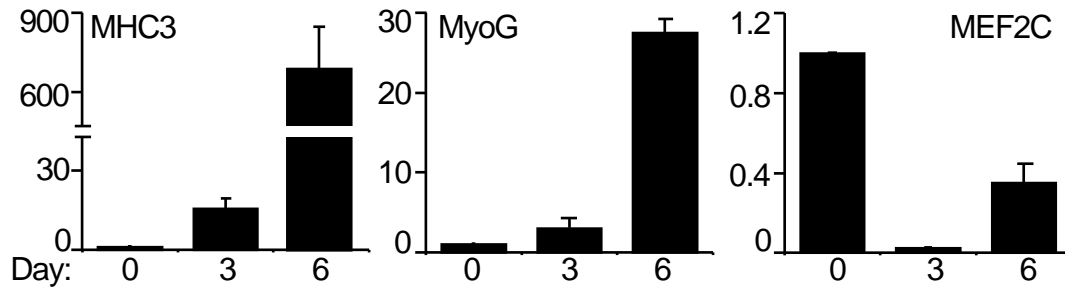

Fig. S3. Freshly isolated SCs were cultured in the absence of growth factors for 6 days. QPCR analysis of the expression of indicated genes in SCs at the time shown. Error bars represent +/- SEM (n=3).

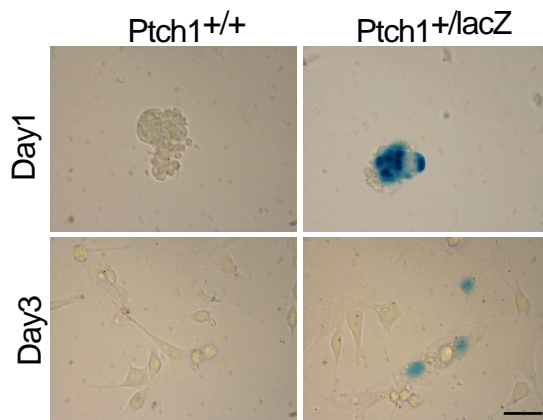

Fig. S4 Freshly isolated SCs from Ptch1<sup>+/+</sup> or Ptch1<sup>+/LacZ</sup> mice were cultured in the absence of growth factors and assayed for β-gal activity on day 1 and day 3. Scale bar is 30 μm.

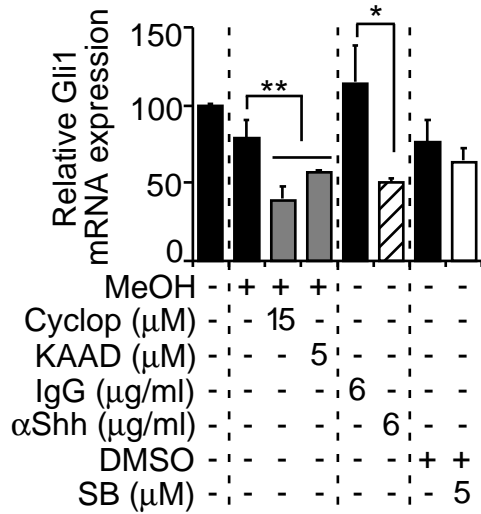

Fig. S5 QPCR analysis of Gli1 mRNA on day 3 of cultured mouse SCs in the presence or absence of cyclopamine (cyclop), KAAD-cyclopamine (KAAD) (grey bars), SB203580 (SB) (white bars) and their respective vehicles (MeOH; methanol) or in the presence of Shh-specific (striped bars) or IgG non-specific antibodies for 3 days. Data from treatment with a specific reagent and its respective vehicle is separated by dashed line and expressed as a percentage of day 3 levels. Error bars represent +/- SEM (n=3). \*p<0.05, \*\*p<0.01.

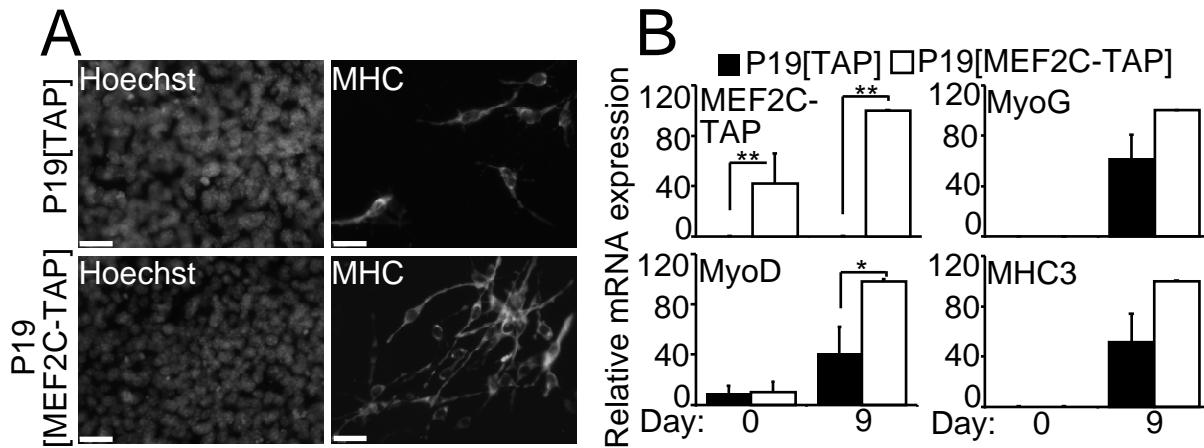

Fig. S6 (A): Day 9 differentiated P19[TAP] and P19[MEF2C-TAP] cells were reacted with MF20 antibodies to detect MHC expression. Nuclei were stained with Hoechst dye. Scale bar is 30 μM. (B): Overexpression of MEF2C upregulates MyoD and MyoG expression while enhancing skeletal myogenesis in P19 EC cells. QPCR analysis of the expression of indicated genes in P19[TAP] (black bars) and P19[MEF2C-TAP] (grey bars) cells at the time shown. Error bars represent +/- SEM from two clonal populations and two biological replicas (n=4), \*p<0.05 and \*\*p<0.01.
